# Supplementary material for: Grafted human ESC-derived astroglia repair spinal cord injury via activation of host anti-inflammatory microglia in the lesion area
Source: PubMed Central journal article supplement (PMC9169351; doi:10.7150/thno.70929), 2022-05-16
Supplement: thnov12p4288s1.pdf [file thnov12p4288s1.pdf]

# Supplementary Figure 1

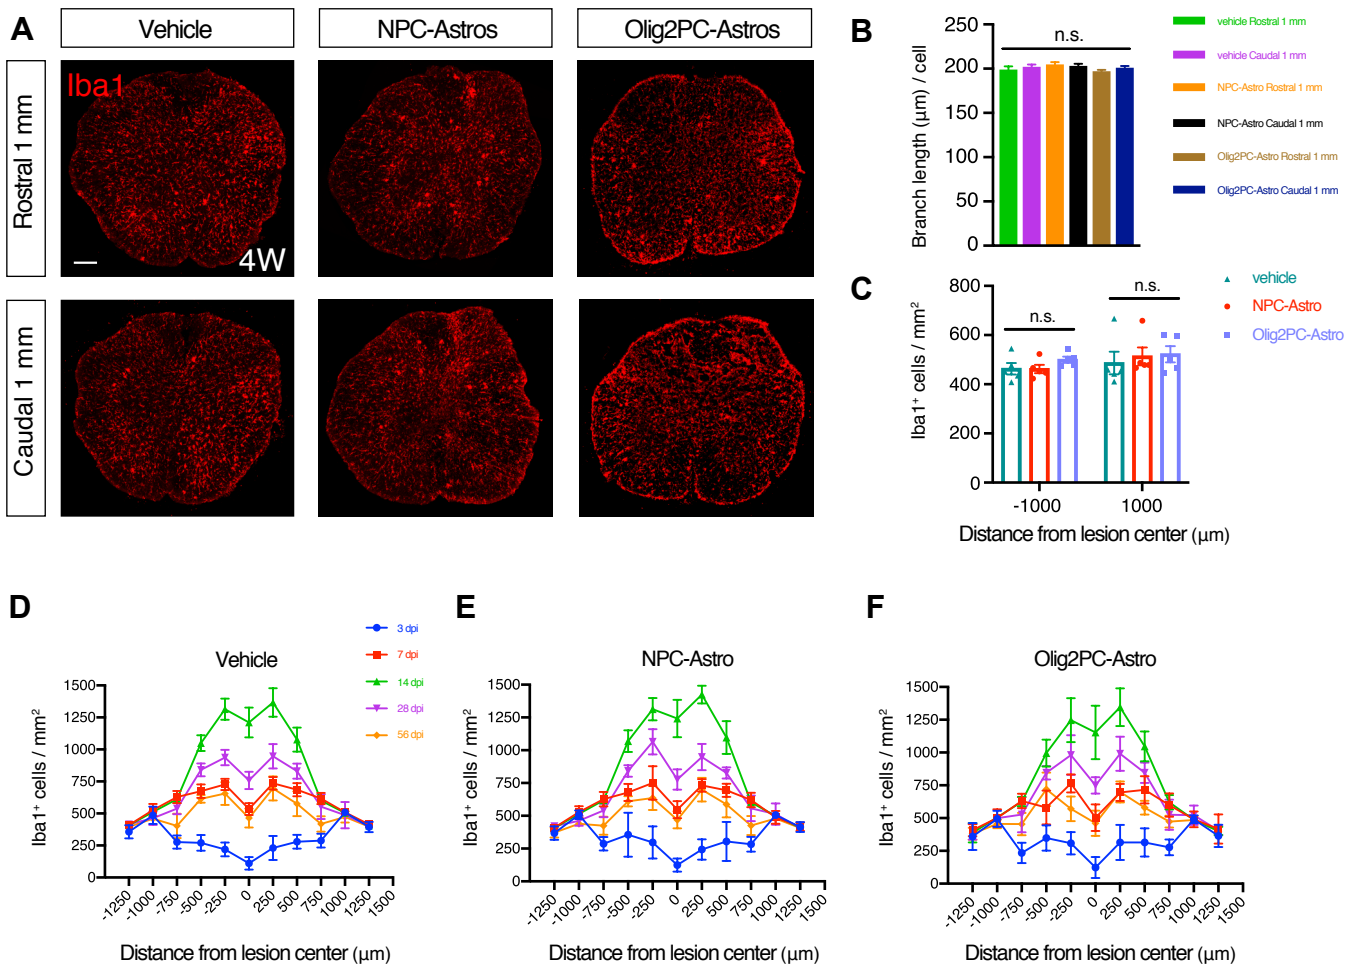

**Figure S1: Microglia at rostral or caudal 1 mm showed no difference in the number and morphology.**

(A) Confocal images of microglia in spinal cord sections taken both rostral (R) and caudal (C) 1 mm to the lesion epicenter. Scale bars: 100  $\mu\text{m}$ . (B) Quantification of microglia branch in spinal cord sections taken both rostral (R) and caudal (C) 1 mm to the lesion epicenter 4 weeks after astroglia transplantation ( $n = 5$  per group). One-way ANOVA followed by Tukey's test. (C) Quantification of total number of Iba1<sup>+</sup> microglia per  $\text{mm}^2$  of tissue in spinal cord sections taken both rostral (R) and caudal (C) to the lesion epicenter at 4 weeks after astroglia transplantation ( $n = 5$  per group). One-way ANOVA followed by Tukey's multiple comparisons test. (D) Quantification of the total number of Iba1<sup>+</sup> microglia per  $\text{mm}^2$  of tissue in spinal cord sections taken both rostral (R) and caudal (C) to the lesion epicenter at 3-56 days after injury ( $n = 5$  per group) (E) Quantification of the total number of Iba1<sup>+</sup> microglia per  $\text{mm}^2$  of tissue in spinal cord sections taken both rostral (R) and caudal (C) to the lesion epicenter at 3-56 days after NPC-Astro transplantation ( $n = 5$  per group). (F) Quantification of the total number of Iba1<sup>+</sup> microglia per  $\text{mm}^2$  of tissue in spinal cord sections taken both rostral (R) and caudal (C) to the lesion epicenter at 3-56 days after Olig2PC-Astro transplantation ( $n = 5$  per group). Two-way ANOVA followed by Tukey's multiple comparisons test. Data are mean  $\pm$  SD; n.s., not significant.

# Supplementary Figure 2

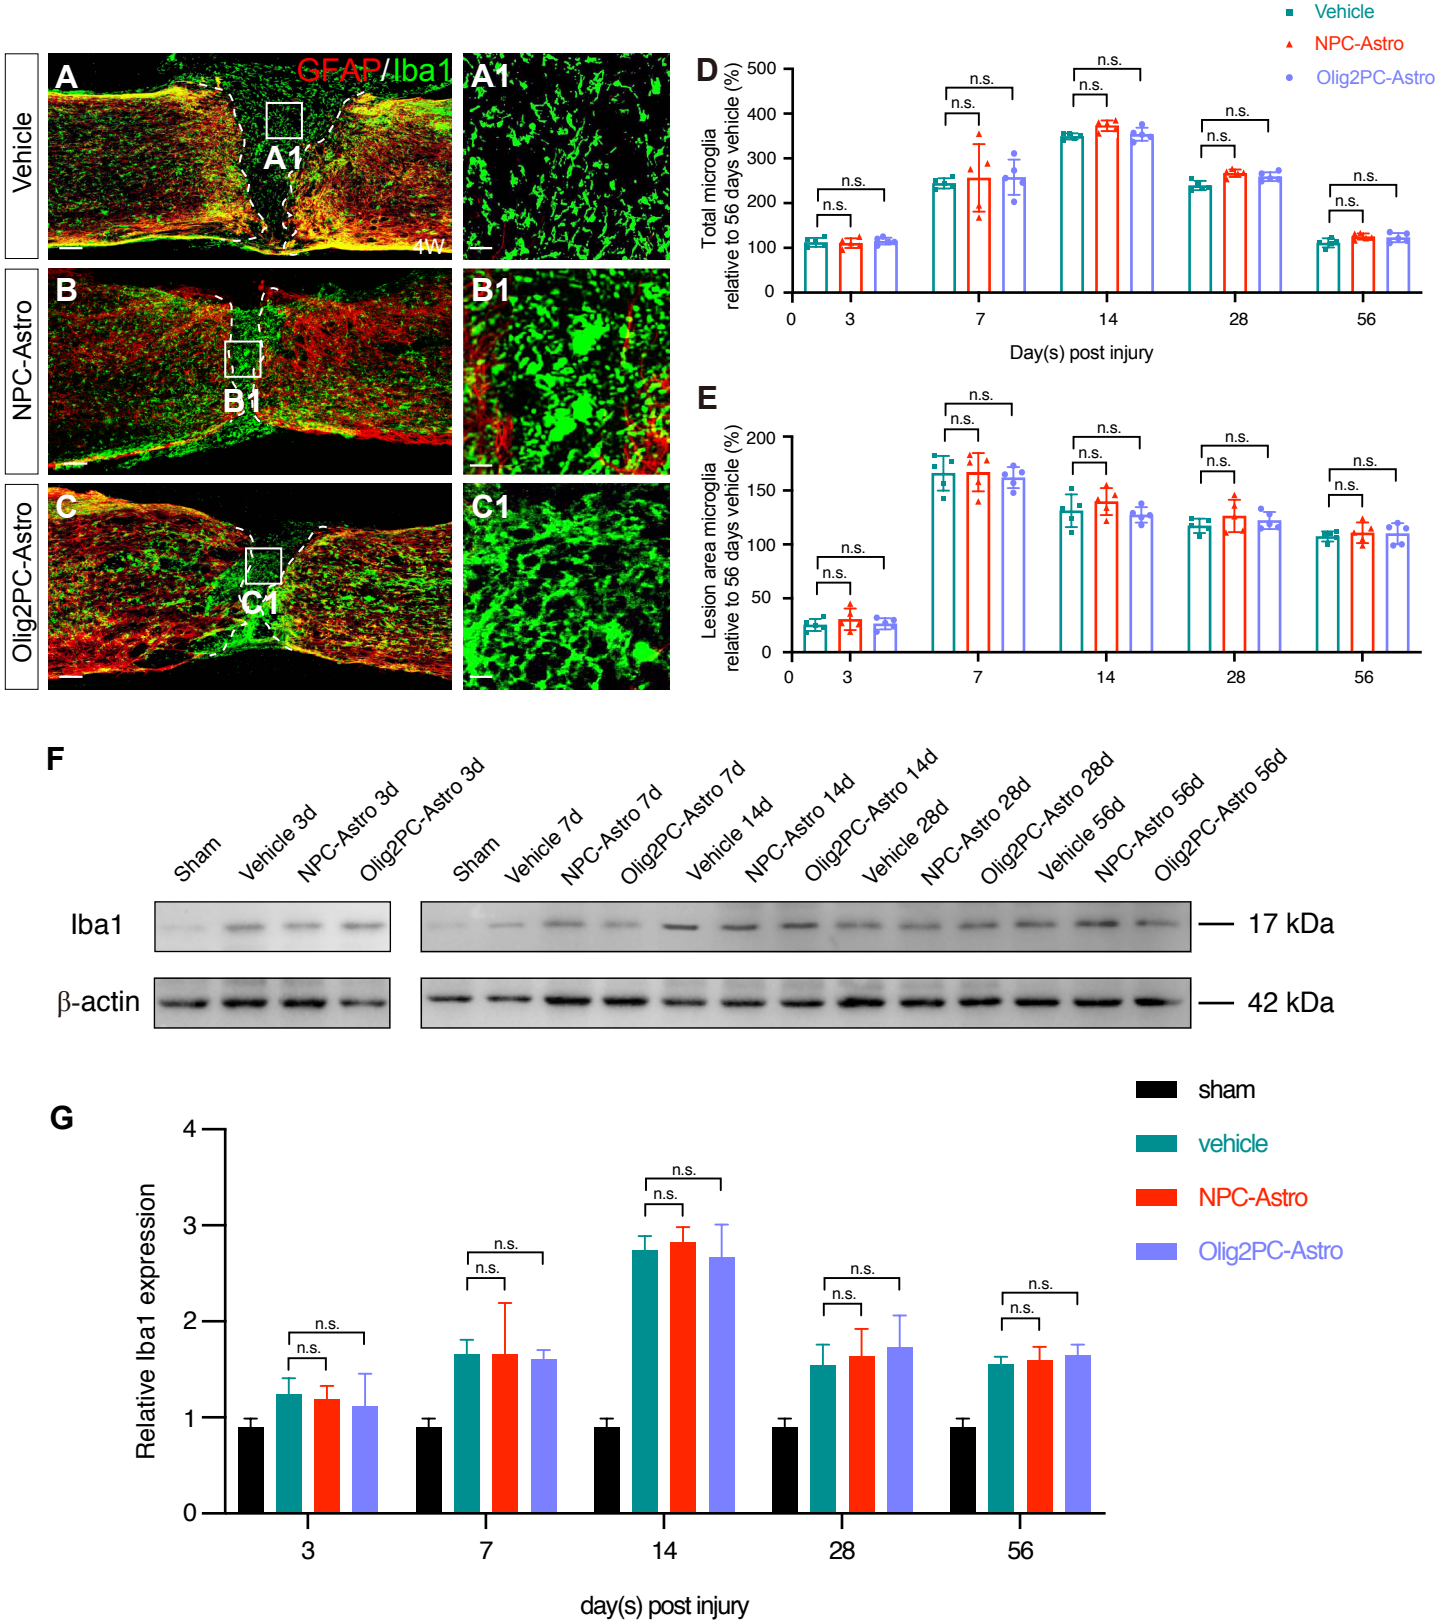

**Figure S2: Grafted astroglia did not promote the increase of microglia.**

(A-C) Representative images showing GFAP (red) and Iba1 (green) labeling in spinal cord sagittal sections at 4 weeks post-transplantation. A1, B1, C1 are higher magnification images of boxed areas in A-C. Scale bars: 200  $\mu\text{m}$  (A-C), 20  $\mu\text{m}$  (A1-C1). (D) Quantification of total Iba1<sup>+</sup> microglia ( $n = 5$  per group). (E) Quantification of Iba1<sup>+</sup> microglia in the lesion area ( $n = 5$  per group). (F) Western blotting for Iba1 expression in the lesion area at 3 to 56 days after transplantation. (G) Quantification of Iba1 expression at 3 to 56 days ( $n = 3$  per group). D, E, G: Two-way ANOVA followed by Tukey's multiple comparisons test. Data are mean  $\pm$  SD; n.s., not significant.

# Supplementary Figure 3

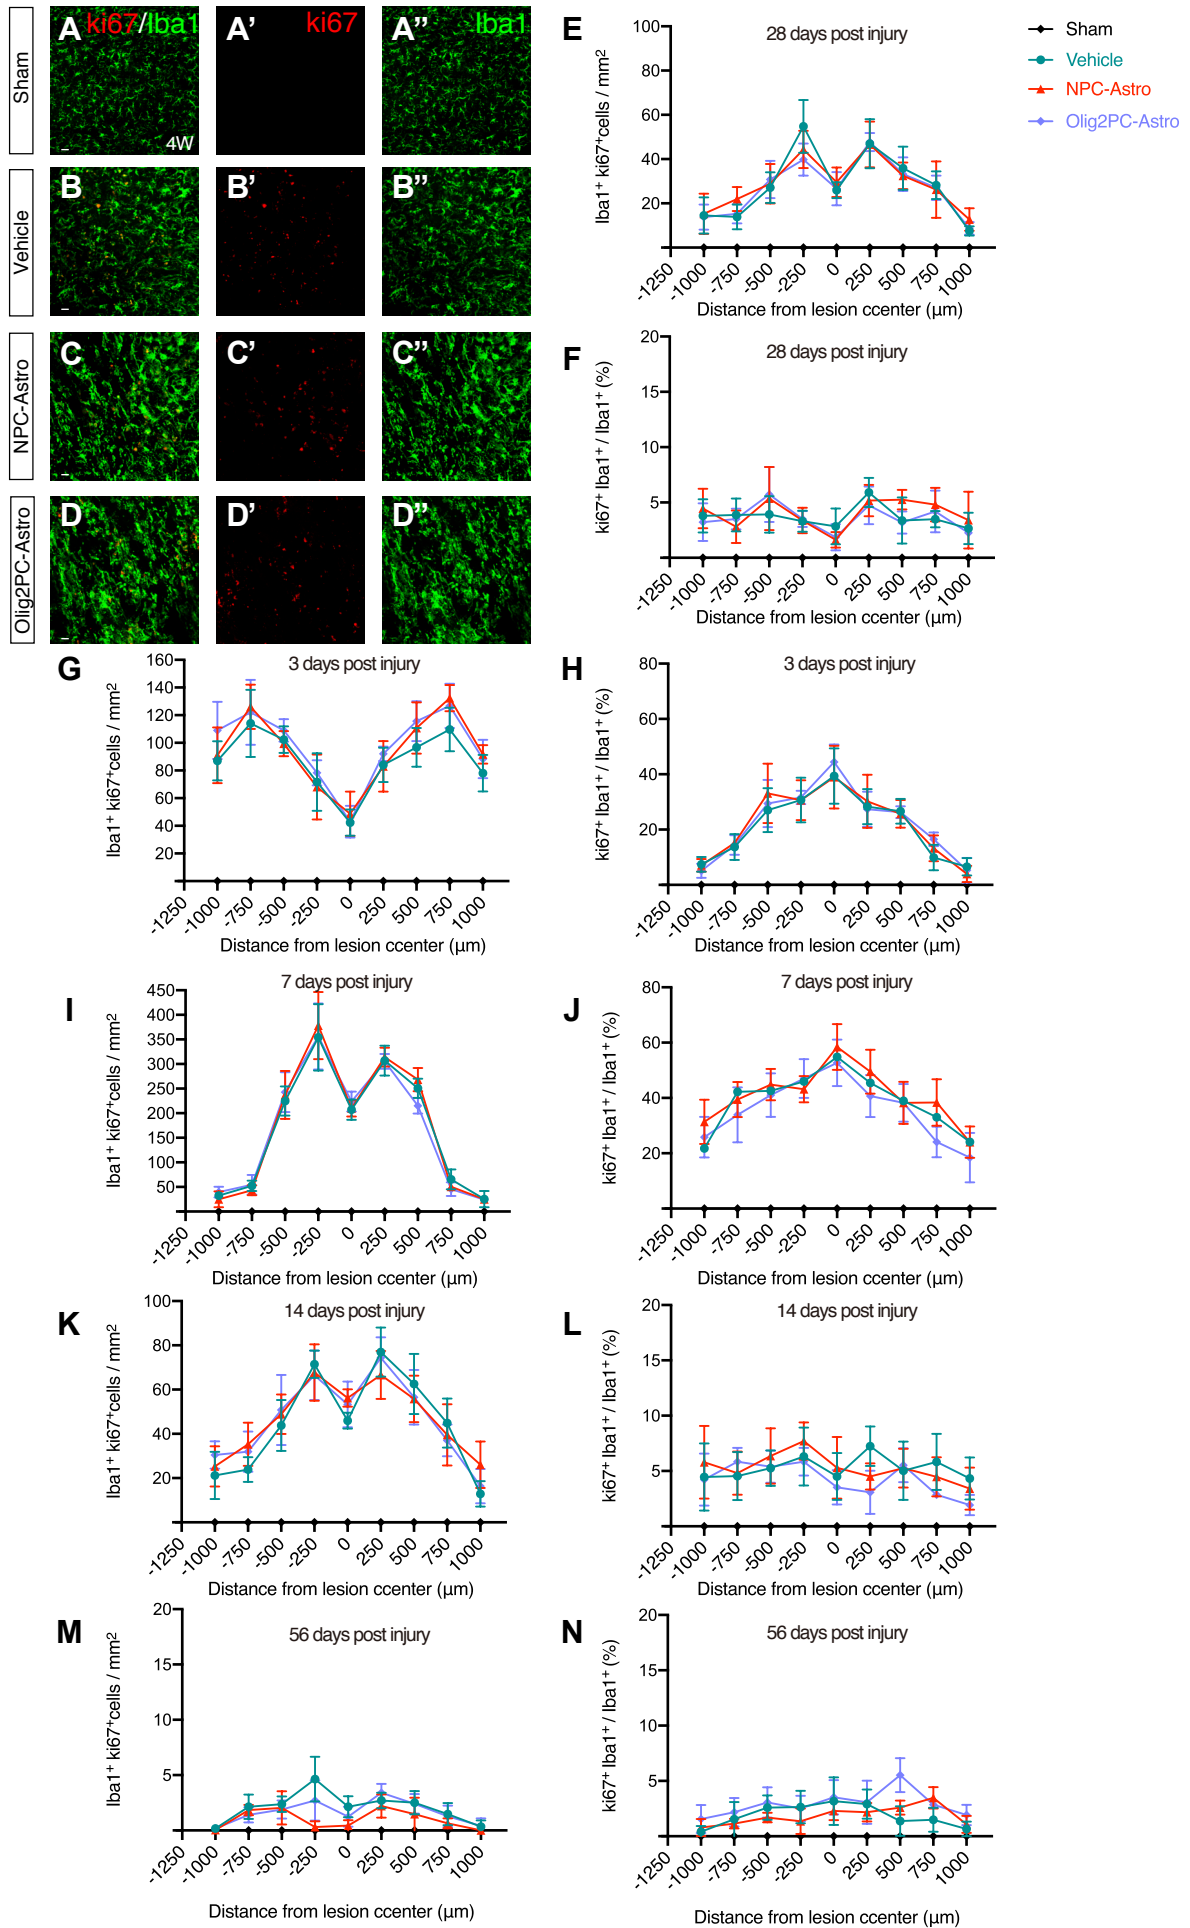

**Figure S3: Grafted astroglia did not promote microglia proliferation.**

**(A-D)** Representative images showing ki67 (red) and Iba1 (green) staining in the lesion center at 4 weeks post-transplantation. Scale bars: 20  $\mu\text{m}$ . **(E)** Quantification of the number of actively proliferating microglia (Iba1<sup>+</sup> Ki67<sup>+</sup> cells) at 28 days after astroglia transplantation ( $n = 5$  per group). **(F)** Percentage of Iba1<sup>+</sup> microglia undergoing proliferation 28 days after astroglia transplantation ( $n = 5$  per group). **(G, I, K, M)** Quantification of the number of actively proliferating microglia (Iba1<sup>+</sup> Ki67<sup>+</sup> cells) at 3, 7, 14, 56 days after astroglia transplantation ( $n = 5$  per group). **(H, J, L, N)** Percentage of Iba1<sup>+</sup> microglia undergoing proliferation 3, 7, 14, 56 days after astroglia transplantation ( $n = 5$  per group). Two-way ANOVA followed by Tukey's multiple comparisons test. Data are mean  $\pm$  SD; n.s., not significant.

# Supplementary Figure 4

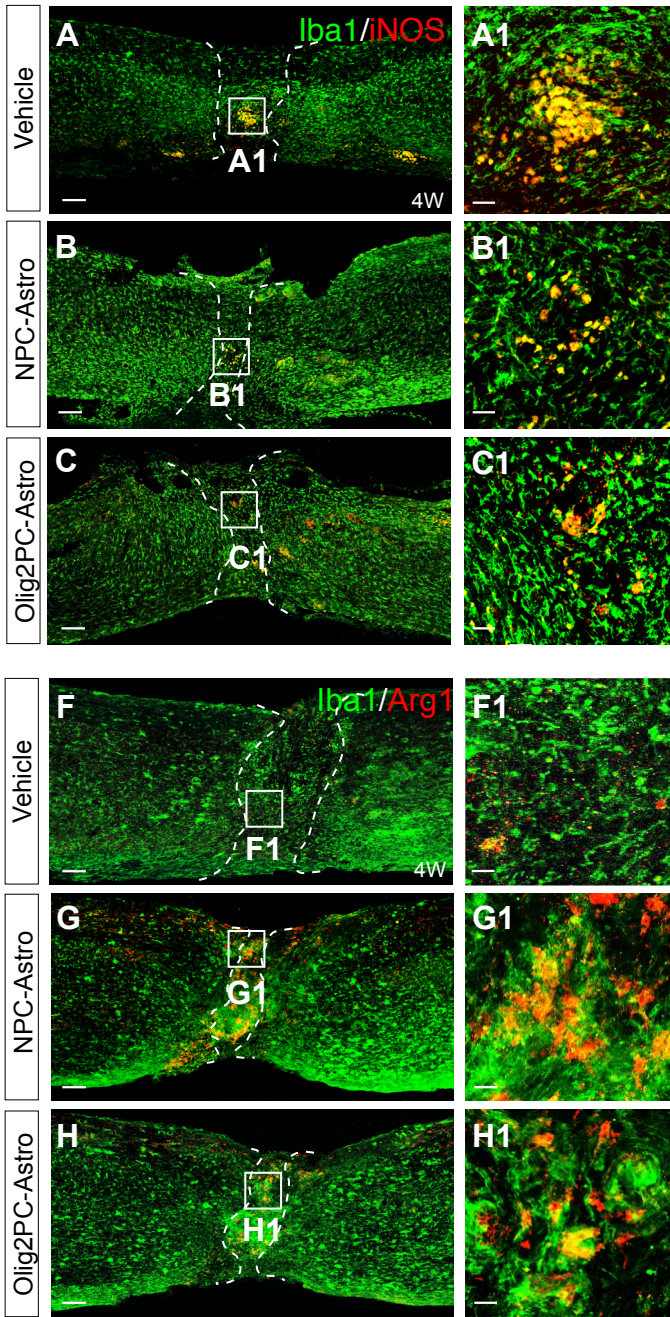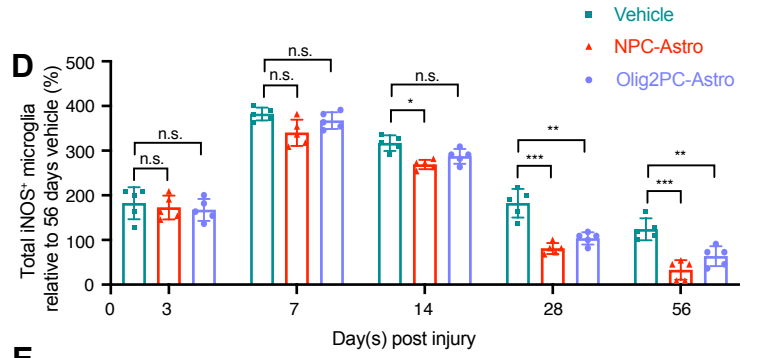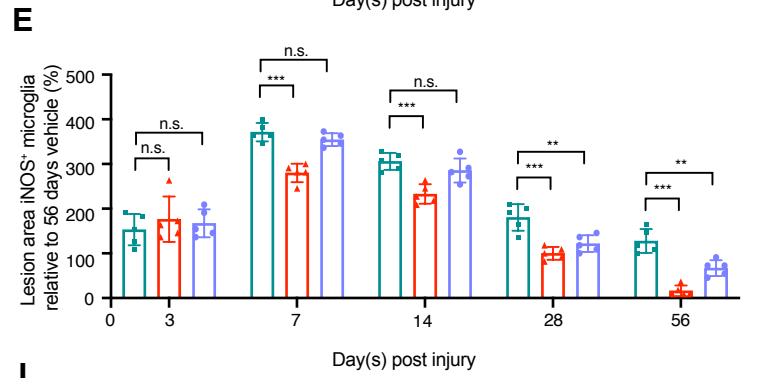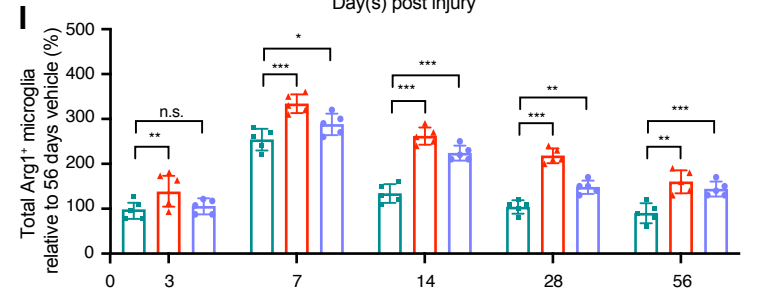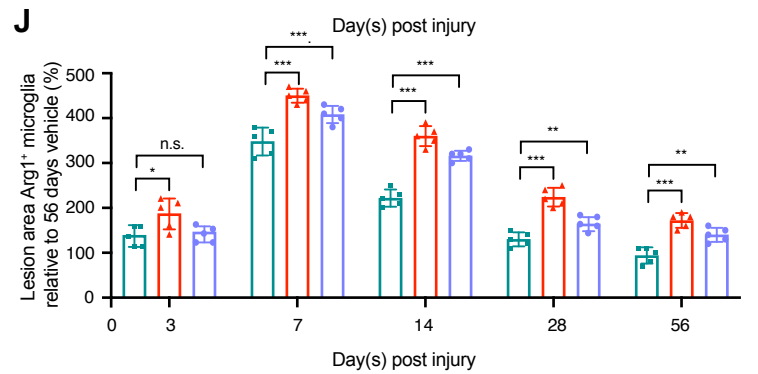



**Figure S4: Grafted astroglia promote anti-inflammatory polarization of microglia.**

(A-C) Representative images showing Iba1 (green) and iNOS (red) labeling in spinal cord sagittal sections at 4 weeks post-transplantation. Scale bars: 200  $\mu\text{m}$  (A-C), 20  $\mu\text{m}$  (A1-C1). (D) Quantification of total iNOS<sup>+</sup> microglia ( $n = 5$  per group). (E) Quantification of iNOS<sup>+</sup> microglia in the lesion area ( $n = 5$  per group). (F-H) Representative images showing Iba1 (green) and Arg1 (red) labeling in spinal cord sagittal sections at 4 weeks post-transplantation. Scale bars: 200  $\mu\text{m}$  (F-H), 20  $\mu\text{m}$  (F1-H1). (I) Quantification of total iNOS<sup>+</sup> microglia ( $n = 5$  per group). (J) Quantification of iNOS<sup>+</sup> microglia in the lesion area ( $n = 5$  per group). **D, E, I, J:** Two-way ANOVA followed by Tukey's multiple comparisons test. Data are mean  $\pm$  SD; \* $p < 0.05$ , \*\* $p < 0.01$ , \*\*\* $p < 0.001$ , n.s., not significant.
